# Supplementary material for: Construction of dense H-bond acceptors in the channels of covalent organic frameworks for proton conduction
Source: Royal Society of Chemistry journal article supplement (doi:10.1039/d3ta01907a), 2023-01-01
Supplement: d3ta01907a1.pdf [file d3ta01907a1.pdf]

## **Construction of Dense H-bond Accept in the Channels of Covalent Organic Frameworks for Proton Conduction**

Sijia Liu<sup>ab</sup>, Minghao Liu<sup>ac</sup>, Xuewen Li<sup>ac</sup>, Qing Xu<sup>\*ac</sup>, Yuhang Sun<sup>\*bd</sup> and Gaofeng Zeng<sup>\*ac</sup>

## Experimental section

**Materials:** 4, 4', 4'', 4'''-(pyrene-1,3,6,8-tetrayl) tetra alkane (PyTTA), 2,5-bis (2-(2-methoxyethoxy) ethoxy-p-phenylenedicarboxylic acid (BMTP) and 2,5-dihydroxyterephthalaldehyde (DHTA) were purchased from Aladdin. Tetrahydrofuran (THF), N-butanol (BuOH), o-dichlorobenzene, (o-DCB) acetic acid (HAc), phosphoric acid crystal (PA) and methanol (MeOH) were from Sinopharm Chemical Reagent Co.,Ltd.

**Synthesis of PyTTA-COFs:** A mixture of o-DCB (0.5 mL), BuOH (0.5 mL), PyTTA (17.0 mg, 0.03 mmol), BMTP (22.2 mg, 0.06 mmol) or DHTA (9.97 mg, 0.06 mmol), and an aqueous acetic acid solution (3 M, 0.2 mL) was degassed in a Pyrex tube (10 mL) by three freeze-pump-thaw cycles. The tube was sealed and heated at 120 °C for 3 days. The precipitate was collected by centrifugation, washed with THF, and dried at 120 °C under vacuum overnight to give PyTTA-BMTP-COF (91.2%) and PyTTA-DHTA-COF (93.0%).

**Synthesis of PA@PyTTA-COFs:** PyTTA-COFs sample (50 mg) in vacuum vial (20 mL) preheated 30 min at 120 °C. Phosphoric acid crystal (100 mg) dissolved in anhydrous THF (3 mL) was injected into the vial to get a solution, which was stirred 3 h at room temperature. The solution was slowly evaporated 3 h under vacuum to remove THF at 70 °C to get PA@PyTTA-BMTP-COF and PA@PyTTA-DHTA-COF.

**Synthesis of 0.5PA@PyTTA-COFs:** PyTTA-COFs sample (50 mg) in vacuum vial (20 mL) preheated 30 min at 120 °C. Phosphoric acid crystal (50 mg) dissolved in anhydrous THF (2 mL) was injected into the vial to get a solution, which was stirred 3 h at room temperature. The solution was slowly evaporated 3 h under vacuum to remove THF at 70 °C to get 0.5PA@PyTTA-BMTP-COF and 0.5PA@PyTTA-DHTA-COF.

**Synthesis of sample (to be tested):** The powders (50 mg) of PA@PyTTA-BMTP-COF, PA@PyTTA-DHTA-COF, 0.5PA@PyTTA-BMTP-COF and 0.5PA@PyTTA-DHTA-COF were pressed 30 minutes into circular tableting with a diameter of 1.0 cm under a pressure of 4 ton by oil press equipment.

**Impedance Measurements:** The tableting was sandwiched between two electrodes. For the first test, preheated electrodes into 100 °C for 4 h to maintain stability, and the temperature rise test needs to be stable for 30 min. The proton conductivity was measured by the alternating-current impedance method (IMP) using an electrochemical workstation (CHI 760E, Shanghai C&H). It tested with a frequency range of 100 Hz-1000000 Hz under anhydrous condition from 100 to 150 °C. The conductivity was calculated using the equation of  $\sigma = L/SR$  where  $\sigma$  is the conductivity ( $\text{mS cm}^{-1}$ ), L is the sample thickness (cm), S is the sample area ( $\text{cm}^2$ ) and R is the tested resistance ( $\Omega$ ). The activation energy ( $E_a$ ) for the material conductivity was estimated from the equation of  $\sigma T = \sigma_0 \exp(-E_a/(K_B T))$ , where  $\sigma_0$  is the pre-exponential factor,  $K_B$  is the Boltzmann constant, and T is the tested temperature.

**Characterization:** Powder X-ray diffraction (PXRD) data were recorded on an Ultima IV diffractometer with Cu K $\alpha$  radiation by depositing powder on glass substrate, from  $2\theta = 3^\circ$  up to  $30^\circ$  with  $0.02^\circ$  increment. Fourier transform infrared (FT IR) spectra were obtained from a Nicolet Magna 550 spectrometer. Solid-state  $^{13}\text{C}$  CM/MAS NMR ( $^{13}\text{C}$  NMR) spectra were recorded on Bruker AVANCE NEO 400 WB spectrometer. Nitrogen

sorption isotherms were measured at 77 K with a TriStar II Micromeritics. The Brunauer-Emmett-Teller (BET) method was utilized to calculate the specific surface areas. By using the non-local density functional theory (NLDFT) model, the pore volume was derived from the sorption curve. X-ray photoelectron spectroscopy (XPS) measurements were carried out on a Thermo Scientific K-Alpha XPS spectrometer using Al K $\alpha$  X-ray source for radiation. Thermogravimetric analysis (TGA) measurements were performed on a Mettler-Toledo model TGA/SDTA851e under N<sub>2</sub>, by heating to 800 °C at a rate of 10 °C min<sup>-1</sup>. High-resolution transmission electron microscope images were obtained by transmission electron microscopy (TEM, FEI Tecnai G2) installed with energy dispersive spectrometer (EDS, Oxford). The morphology was measured by a scanning electron microscope (SEM, Zeiss SUPRA 55 SAPPHIRE).

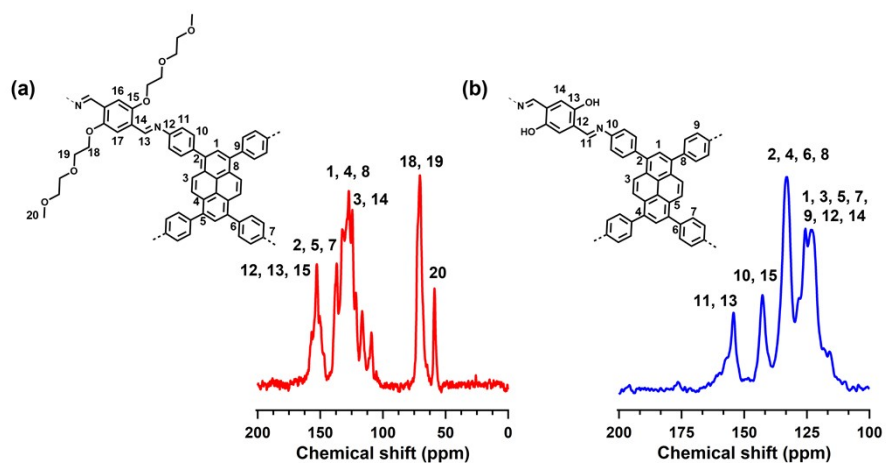

Figure S1. The  $^{13}\text{C}$  NMR spectrum of (a) PyTTA-BMTP-COF and (b) PyTTA-DHAT-COF.

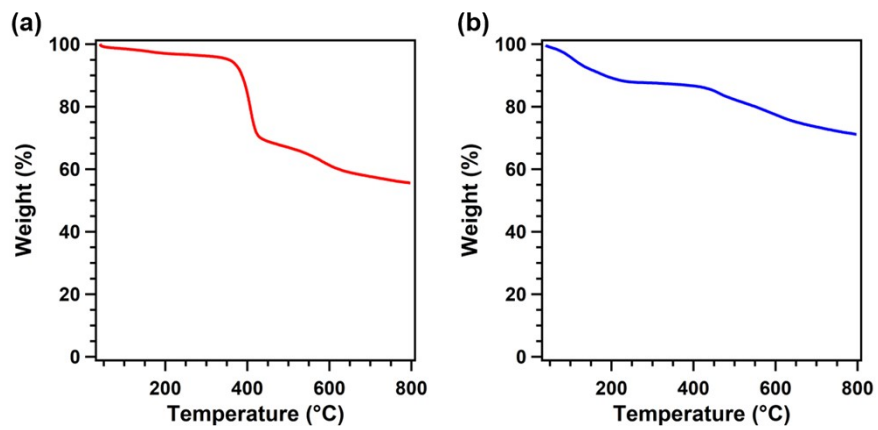

Figure S2. TGA profiles for (a) PyTTA-BMTP-COF and (b) PyTTA-DHAT-COF from 40 to 800 °C under N<sub>2</sub>.

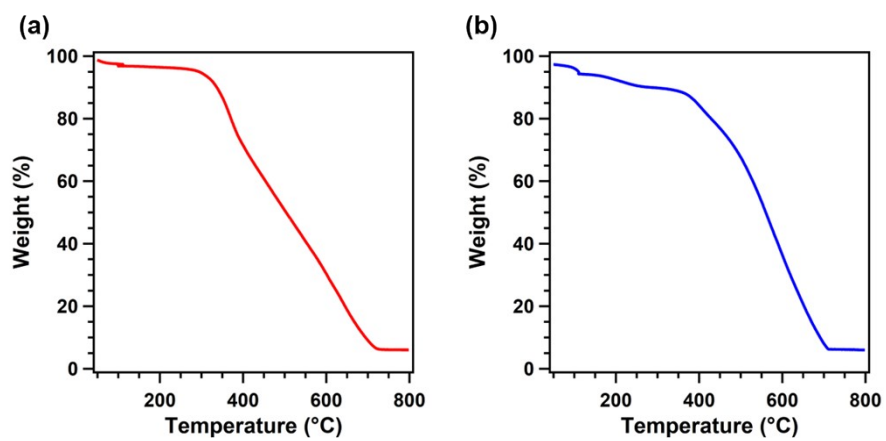

Figure S3. TGA curves of (a) PyTTA-BMTP-COF and (b) PyTTA-DHTA-COF from 40 to 800 °C under air.

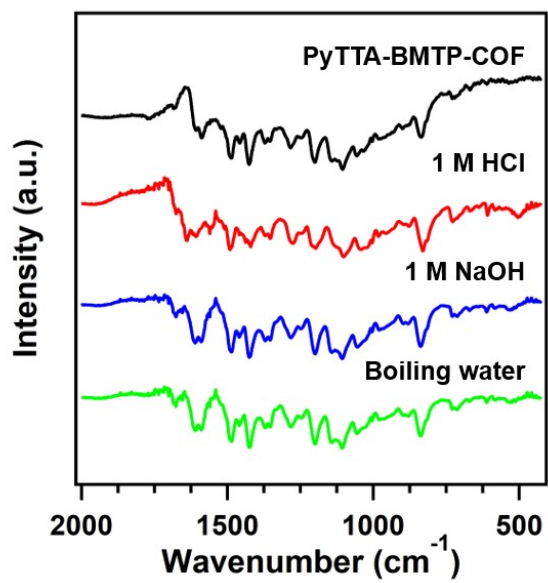

Figure S4. The FT IR spectra of PyTTA-BMTP-COF in 1 M HCl, 1 M NaOH and boiling water for one week.

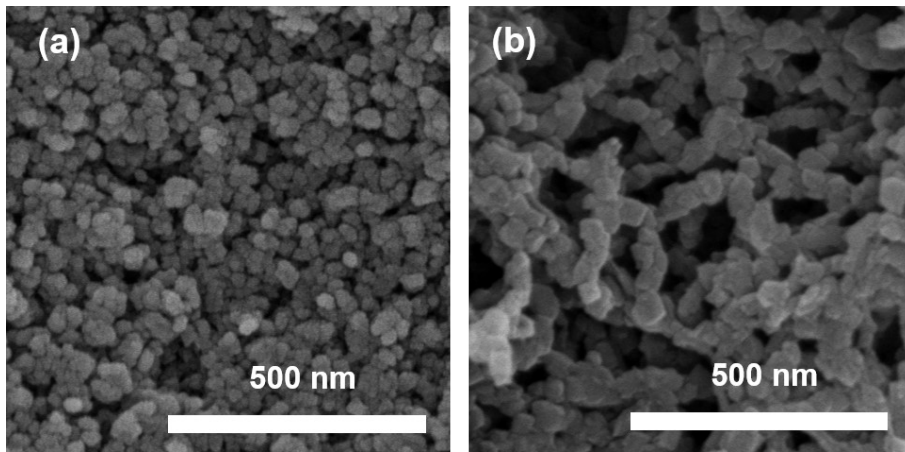

Figure S5. SEM images of (a) PyTTA-BMTP-COF and (b) PyTTA-DHAT-COF.



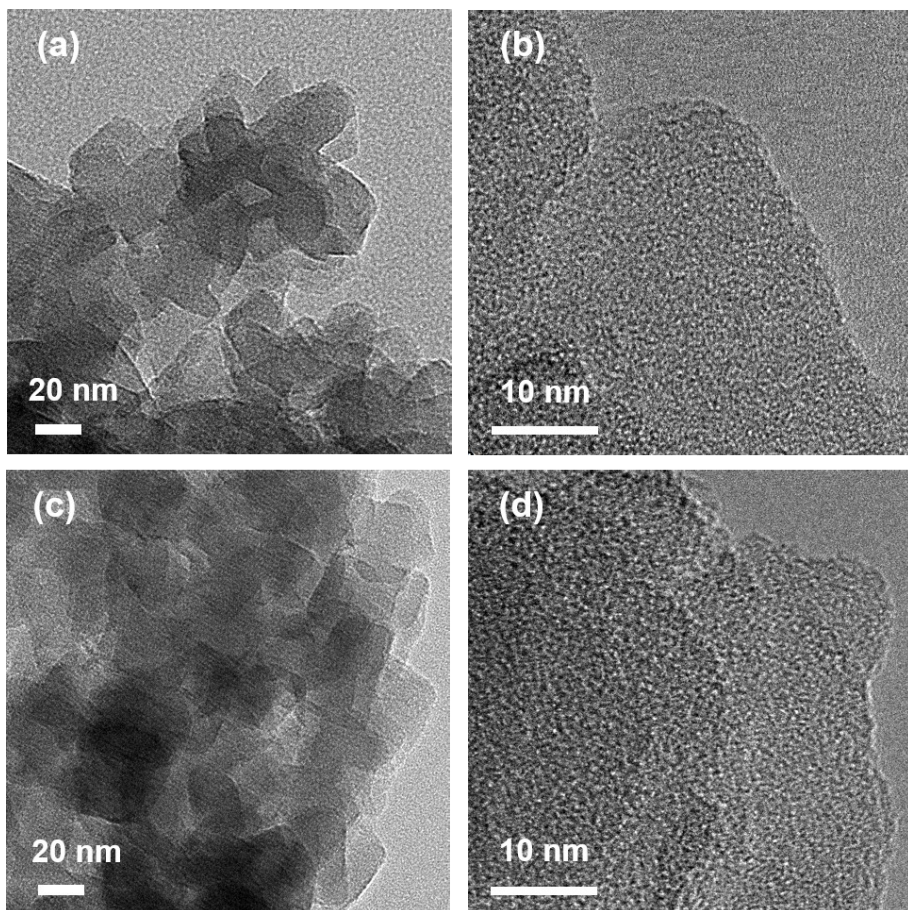

Figure S6. (a) TEM and (b) HR-TEM images of PyTTA-BMTP-COF, (c) TEM and (d) HR-TEM images PyTTA-DHAT-COF.

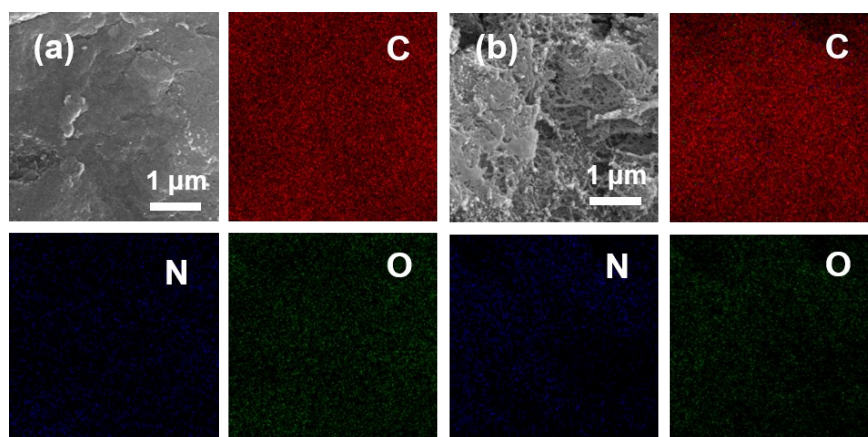

Figure S7. EDX images of (a) PyTTA-BMTP-COF and (b) PyTTA-DHAT-COF.

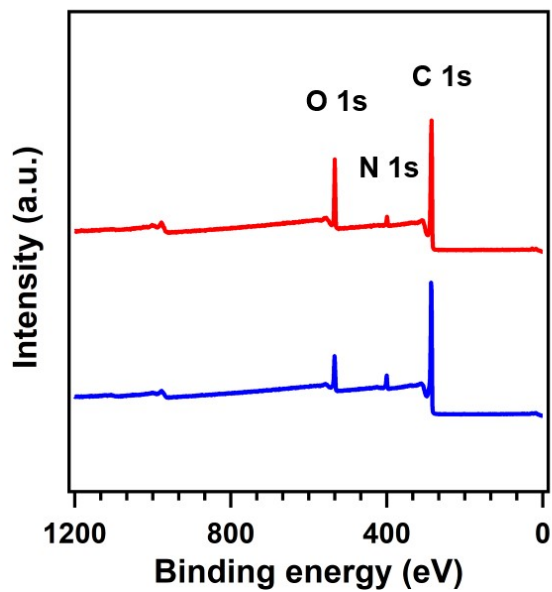

Figure S8. XPS spectra of PyTTA-BMTP-COF (red curve) and PyTTA-DHAT-COF (blue curve).

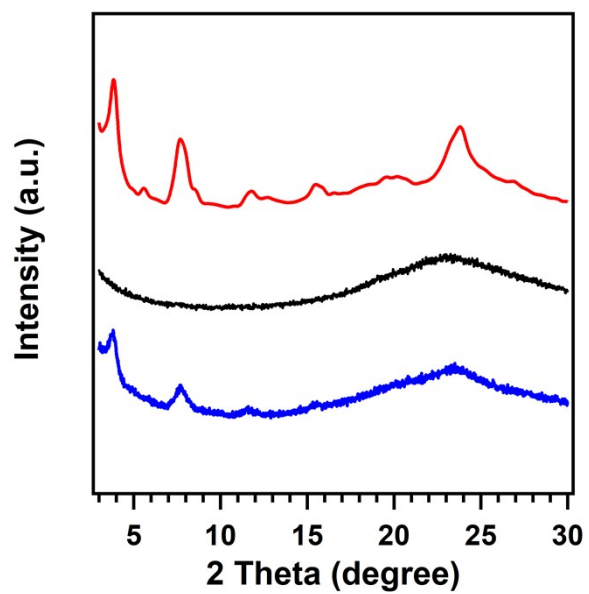

Figure S9. PXRD profile of PyTTA-BMTP-COF (red curve), PA@PyTTA-DHAT-COF (black curve) and PA@PyTTA-DHAT-COF after washing (blue curve).

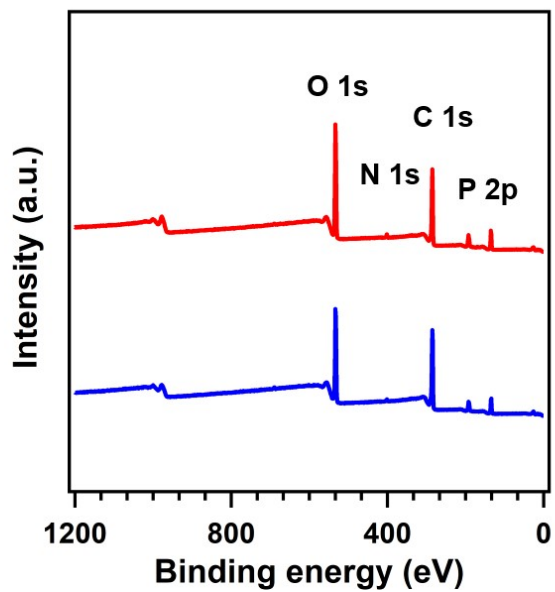

Figure S10. XPS spectra of PA@PyTTA-BMTP-COF (red curve) and PA@PyTTA-DHAT-COF (blue curve).

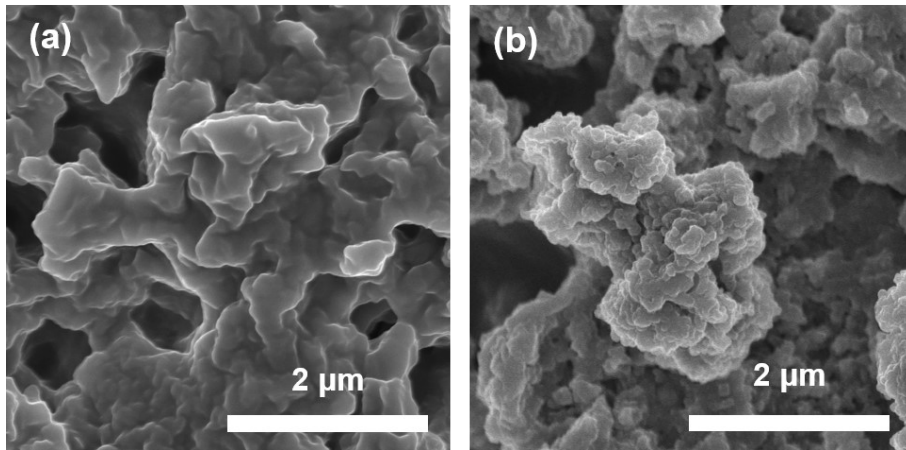

Figure S11. SEM images of (a) PA@PyTTA-BMTP-COF and (b) PA@PyTTA-DHAT-COF.

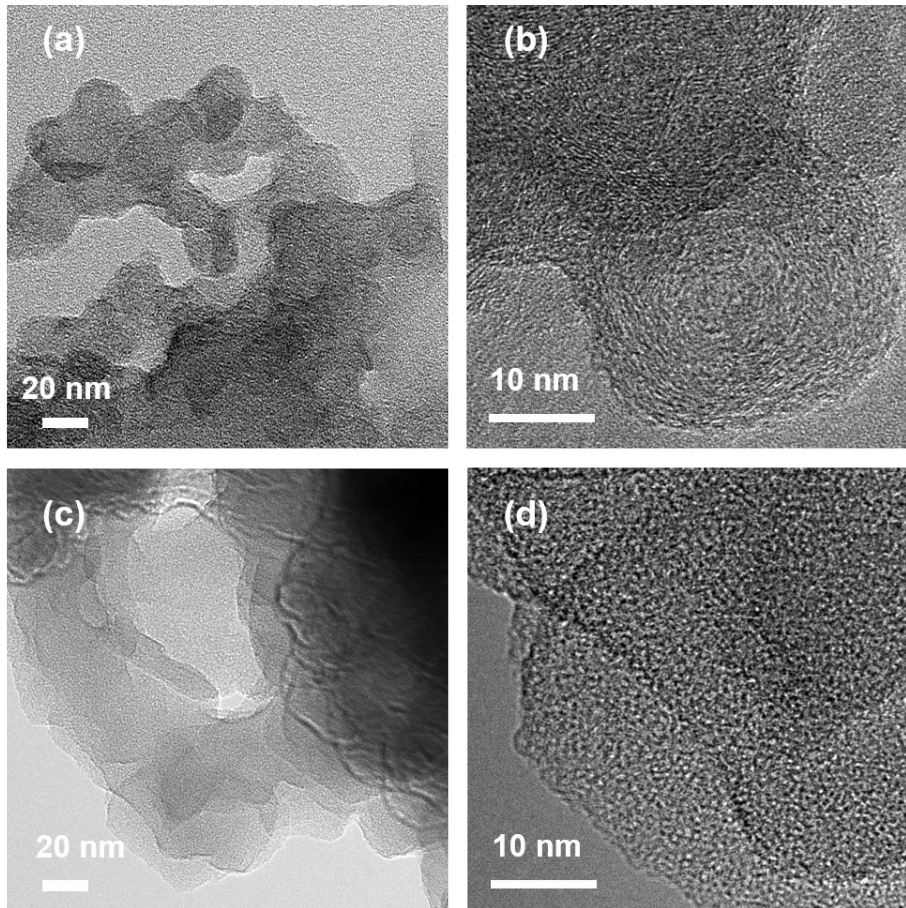

Figure S12. (a) TEM and (b) HR-TEM images of PA@PyTTA-BMTP-COF, (c) TEM and (d) HR-TEM images PA@PyTTA-DHAT-COF.

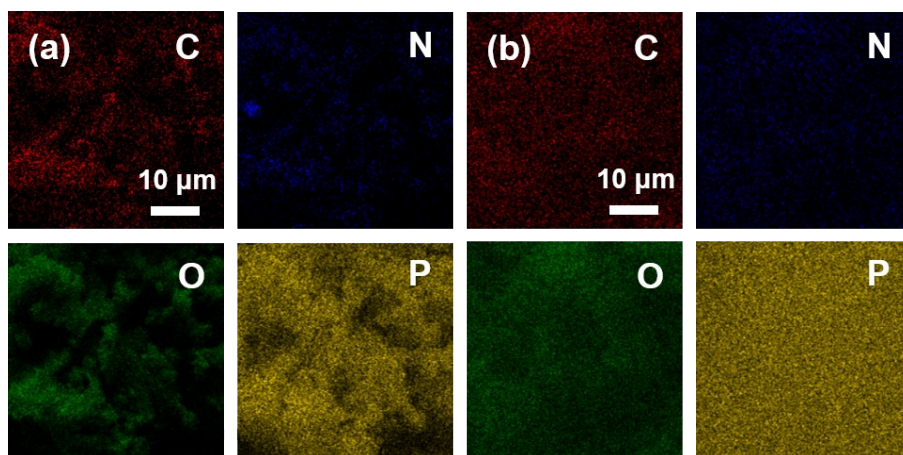

Figure S13. EDX images of (a) PA@PyTTA-BMTP-COF and (b) PA@PyTTA-DHAT-COF.



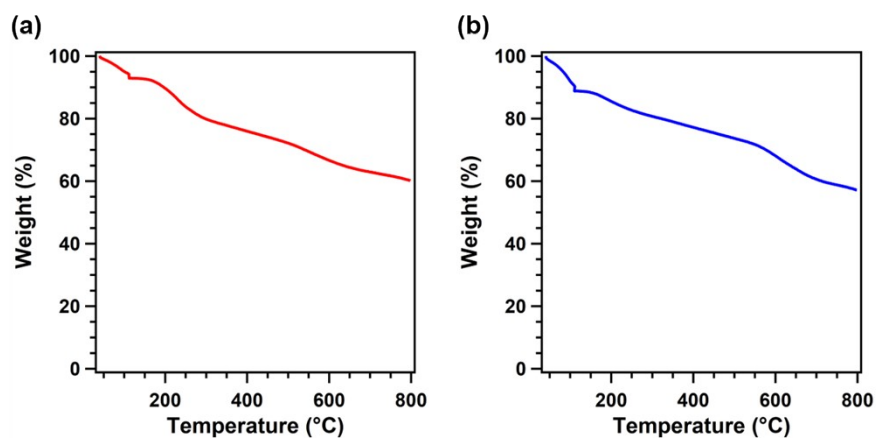

Figure S14. TGA profiles for (a) PA@PyTTA-BMTP-COF and (b) PA@PyTTA-DHAT-COF from 40 to 800 °C under N<sub>2</sub>.

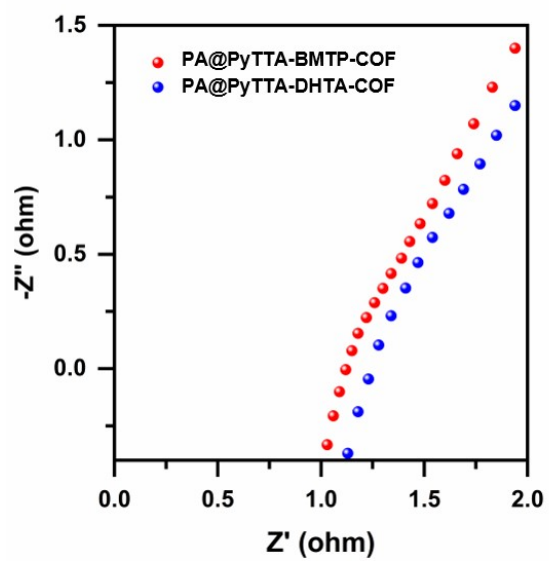

Figure S15. Nyquist plots of PA@PyTTA-BMTP-COF (red) and PA@PyTTA-DHTA-COF (blue) at 90 °C under 90% RH.

Table S1. Atomistic coordinates of AA stacking model for PyTTA-BMTP-COF optimized by using CASTEP-method.

Space group: *P1*;

$a = 24.0373 \text{ \AA}$ ,  $b = 24.4164 \text{ \AA}$ ,  $c = 3.5865 \text{ \AA}$ ;

$\alpha = \beta = 90.0000^\circ$ ,  $\gamma = 84.4770^\circ$ .

|     | Atom | x/a     | y/b      | z/c      |
|-----|------|---------|----------|----------|
| N1  | N    | 0.84222 | -1.56729 | -0.4319  |
| C2  | C    | 0.92769 | -1.52188 | -0.40542 |
| C3  | C    | 1.022   | -1.5621  | -0.52945 |
| C4  | C    | 1.04335 | -1.51224 | -0.44956 |
| C5  | C    | 0.94903 | -1.47203 | -0.32541 |
| C6  | C    | 0.86672 | -1.52302 | -0.37584 |
| C7  | C    | 1.10429 | -1.5111  | -0.48023 |
| C8  | C    | 1.49111 | -1.95937 | -0.57278 |
| C9  | C    | 1.42582 | -2.02915 | -0.54901 |
| C10 | C    | 1.46889 | -2.07045 | -0.61694 |
| C11 | C    | 1.53383 | -2.0006  | -0.65155 |
| C12 | C    | 1.50836 | -1.90353 | -0.52433 |
| C13 | C    | 1.4541  | -2.12757 | -0.60952 |
| C14 | C    | 1.0111  | -1.23346 | 0.07314  |
| O15 | O    | 0.97965 | -1.27814 | 0.0313   |
| C16 | C    | 1.01853 | -1.32166 | -0.0696  |
| C17 | C    | 0.98853 | -1.37205 | -0.15127 |
| O18 | O    | 1.02826 | -1.41616 | -0.25993 |
| C19 | C    | 1.00663 | -1.46624 | -0.34484 |
| C20 | C    | 0.95984 | -1.80062 | -0.92894 |
| O21 | O    | 0.99133 | -1.75598 | -0.88662 |
| C22 | C    | 0.95248 | -1.71245 | -0.78549 |
| C23 | C    | 0.98251 | -1.66208 | -0.70369 |
| O24 | O    | 0.94279 | -1.61797 | -0.59488 |
| C25 | C    | 0.96442 | -1.56789 | -0.50998 |
| C26 | C    | 1.74853 | -2.1604  | -1.03756 |
| O27 | O    | 1.71379 | -2.11187 | -0.98799 |
| C28 | C    | 1.66133 | -2.12927 | -0.91515 |
| C29 | C    | 1.62017 | -2.0798  | -0.83471 |
| O30 | O    | 1.56669 | -2.09778 | -0.75994 |
| C31 | C    | 1.52366 | -2.05625 | -0.67936 |
| C32 | C    | 1.4355  | -1.97371 | -0.53644 |
| O33 | O    | 1.38935 | -1.93565 | -0.46663 |
| C34 | C    | 1.38123 | -1.89285 | -0.73465 |
| C35 | C    | 1.33212 | -1.85288 | -0.62145 |
| O36 | O    | 1.3331  | -1.80432 | -0.82451 |
| C37 | C    | 1.28875 | -1.76955 | -0.68255 |
| C38 | C    | 1.58614 | -1.63018 | -0.3475  |

|     |   |         |          |          |
|-----|---|---------|----------|----------|
| C39 | C | 1.60438 | -1.57771 | -0.37913 |
| C40 | C | 1.56361 | -1.53203 | -0.41468 |
| C41 | C | 1.50597 | -1.54007 | -0.41305 |
| C42 | C | 1.48905 | -1.59383 | -0.37369 |
| C43 | C | 1.52972 | -1.63969 | -0.34342 |
| C44 | C | 1.46507 | -1.49421 | -0.4559  |
| C45 | C | 1.40743 | -1.50228 | -0.45331 |
| C46 | C | 1.39212 | -1.55566 | -0.4095  |
| C47 | C | 1.43195 | -1.60037 | -0.37356 |
| C48 | C | 1.57892 | -1.47866 | -0.45925 |
| C49 | C | 1.5391  | -1.43399 | -0.4987  |
| C50 | C | 1.48199 | -1.44051 | -0.49962 |
| C51 | C | 1.4413  | -1.39475 | -0.53857 |
| C52 | C | 1.38488 | -1.40432 | -0.53026 |
| C53 | C | 1.36665 | -1.45664 | -0.48972 |
| C54 | C | 1.51643 | -1.69826 | -0.32771 |
| C55 | C | 1.30492 | -1.46043 | -0.47954 |
| C56 | C | 1.4544  | -1.33628 | -0.57969 |
| C57 | C | 1.66612 | -1.57387 | -0.38566 |
| C58 | C | 1.46375 | -1.71279 | -0.21709 |
| C59 | C | 1.45153 | -1.76754 | -0.2232  |
| C60 | C | 1.49188 | -1.80904 | -0.33823 |
| C61 | C | 1.54515 | -1.79536 | -0.44015 |
| C62 | C | 1.55721 | -1.74057 | -0.43352 |
| C63 | C | 1.26863 | -1.41346 | -0.39393 |
| C64 | C | 1.21085 | -1.41588 | -0.37958 |
| C65 | C | 1.18806 | -1.46529 | -0.45128 |
| C66 | C | 1.22372 | -1.51228 | -0.54196 |
| C67 | C | 1.28143 | -1.50966 | -0.55703 |
| C68 | C | 1.70254 | -1.62076 | -0.47098 |
| C69 | C | 1.76032 | -1.61828 | -0.48253 |
| C70 | C | 1.7472  | -1.52197 | -0.31759 |
| C71 | C | 1.68948 | -1.52466 | -0.30526 |
| C72 | C | 1.50804 | -1.32248 | -0.67376 |
| C73 | C | 1.51941 | -1.26763 | -0.70338 |
| C74 | C | 1.42317 | -1.23828 | -0.55412 |
| C75 | C | 1.41203 | -1.29317 | -0.52389 |
| N76 | N | 1.47668 | -1.86406 | -0.36943 |
| N77 | N | 1.12883 | -1.46681 | -0.4257  |
| C78 | C | 1.78299 | -1.56888 | -0.40824 |
| C79 | C | 1.47719 | -1.22522 | -0.6423  |
| N80 | N | 1.49063 | -2.16946 | -0.66072 |
| C81 | C | 0.80177 | 0.85591  | -0.03756 |
| O82 | O | 0.83063 | 0.79817  | -0.03756 |

|     |   |         |         |          |
|-----|---|---------|---------|----------|
| C83 | C | 0.8883  | 0.81464 | -0.03756 |
| C84 | C | 0.97004 | 0.81442 | 0.87796  |
| O85 | O | 1.01125 | 0.85097 | 0.87796  |
| C86 | C | 0.97019 | 0.89426 | 0.87796  |
| C87 | C | 1.00088 | 0.15258 | 0.07106  |
| O88 | O | 0.96082 | 0.1135  | 0.07106  |
| C89 | C | 0.99699 | 0.06775 | 0.07106  |
| C90 | C | 0.28154 | 0.28247 | 0.1708   |
| O91 | O | 0.23676 | 0.3049  | 0.36016  |
| C92 | C | 0.23069 | 0.35698 | 0.20985  |

---

Table S2. Atomistic coordinates of AB stacking model for PyTTA-BMTP-COF optimized by using CASTEP-method.

Space group: *P1*;

$a = 24.1073 \text{ \AA}$ ,  $b = 24.5783 \text{ \AA}$ ,  $c = 6.7459 \text{ \AA}$ ;

$\alpha = \beta = \gamma = 90.0000^\circ$ .

|     | Atom | x/a      | y/b     | z/c     |
|-----|------|----------|---------|---------|
| N1  | N    | 0.81361  | 0.45149 | 0.19626 |
| C2  | C    | 0.90416  | 0.48928 | 0.27102 |
| C3  | C    | -0.00805 | 0.44258 | 0.25165 |
| C4  | C    | 0.02075  | 0.49192 | 0.27193 |
| C5  | C    | 0.93298  | 0.53845 | 0.29346 |
| C6  | C    | 0.84325  | 0.4916  | 0.26433 |
| C7  | C    | 0.08166  | 0.49045 | 0.26249 |
| C8  | C    | 0.46946  | 0.05314 | 0.21289 |
| C9  | C    | 0.4105   | 0.97348 | 0.24914 |
| C10 | C    | 0.4563   | 0.93958 | 0.23452 |
| C11 | C    | 0.51532  | 1.01932 | 0.20064 |
| C12 | C    | 0.48058  | 0.11166 | 0.19592 |
| C13 | C    | 0.4445   | 0.88101 | 0.24173 |
| C14 | C    | 0.04138  | 0.77521 | 0.3426  |
| O15 | O    | 1.00014  | 0.73524 | 0.35697 |
| C16 | C    | 0.02896  | 0.68656 | 0.34317 |
| C17 | C    | 0.98907  | 0.63869 | 0.32702 |
| O18 | O    | 0.0206   | 0.59028 | 0.31348 |
| C19 | C    | -0.00884 | 0.54072 | 0.29503 |
| C20 | C    | 0.88642  | 0.21242 | 0.07535 |
| O21 | O    | 0.92511  | 0.24693 | 0.16627 |
| C22 | C    | 0.89608  | 0.29476 | 0.19828 |
| C23 | C    | 0.93583  | 0.3428  | 0.21378 |
| O24 | O    | 0.90411  | 0.39079 | 0.23605 |
| C25 | C    | 0.93363  | 0.4403  | 0.25208 |
| C26 | C    | 0.74575  | 0.90398 | 0.1478  |
| O27 | O    | 0.70574  | 0.94387 | 0.17204 |
| C28 | C    | 0.65525  | 0.91557 | 0.17723 |
| C29 | C    | 0.60866  | 0.95605 | 0.18866 |
| O30 | O    | 0.55645  | 0.92841 | 0.20116 |
| C31 | C    | 0.50995  | 0.9624  | 0.21259 |
| C32 | C    | 0.41604  | 0.03036 | 0.23946 |
| O33 | O    | 0.37008  | 0.06468 | 0.25917 |
| C34 | C    | 0.31722  | 0.03825 | 0.26738 |
| C35 | C    | 0.27261  | 0.0797  | 0.3093  |
| O36 | O    | 0.27112  | 0.11844 | 0.15868 |
| C37 | C    | 0.27347  | 0.16825 | 0.25795 |
| C38 | C    | 0.55407  | 0.3875  | 0.17159 |

|     |   |         |         |         |
|-----|---|---------|---------|---------|
| C39 | C | 0.57593 | 0.44028 | 0.17775 |
| C40 | C | 0.53877 | 0.4842  | 0.19131 |
| C41 | C | 0.48085 | 0.47377 | 0.20209 |
| C42 | C | 0.46014 | 0.41946 | 0.19773 |
| C43 | C | 0.49732 | 0.37567 | 0.18139 |
| C44 | C | 0.44343 | 0.51781 | 0.2173  |
| C45 | C | 0.38561 | 0.50709 | 0.22944 |
| C46 | C | 0.36648 | 0.45321 | 0.22562 |
| C47 | C | 0.40291 | 0.41038 | 0.2086  |
| C48 | C | 0.5579  | 0.53819 | 0.19202 |
| C49 | C | 0.52126 | 0.5812  | 0.2066  |
| C50 | C | 0.46398 | 0.57223 | 0.22036 |
| C51 | C | 0.42644 | 0.61599 | 0.23652 |
| C52 | C | 0.36975 | 0.60356 | 0.25073 |
| C53 | C | 0.34835 | 0.55061 | 0.24773 |
| C54 | C | 0.48047 | 0.31696 | 0.17972 |
| C55 | C | 0.28701 | 0.5437  | 0.26528 |
| C56 | C | 0.4425  | 0.67512 | 0.23878 |
| C57 | C | 0.63755 | 0.4461  | 0.17562 |
| C58 | C | 0.42849 | 0.29849 | 0.24884 |
| C59 | C | 0.41589 | 0.24285 | 0.25848 |
| C60 | C | 0.45518 | 0.2048  | 0.20015 |
| C61 | C | 0.50683 | 0.22293 | 0.129   |
| C62 | C | 0.51914 | 0.27823 | 0.11891 |
| C63 | C | 0.25605 | 0.58465 | 0.35686 |
| C64 | C | 0.19848 | 0.58031 | 0.3707  |
| C65 | C | 0.17068 | 0.53485 | 0.29389 |
| C66 | C | 0.20092 | 0.49369 | 0.20127 |
| C67 | C | 0.25859 | 0.4983  | 0.18655 |
| C68 | C | 0.6696  | 0.40504 | 0.08995 |
| C69 | C | 0.72736 | 0.40753 | 0.09636 |
| C70 | C | 0.72295 | 0.49243 | 0.27585 |
| C71 | C | 0.66498 | 0.48973 | 0.2697  |
| C72 | C | 0.49798 | 0.69364 | 0.23927 |
| C73 | C | 0.511   | 0.74929 | 0.23994 |
| C74 | C | 0.41322 | 0.76961 | 0.24084 |
| C75 | C | 0.40051 | 0.71425 | 0.23993 |
| N76 | N | 0.44272 | 0.14804 | 0.21896 |
| N77 | N | 0.11164 | 0.53273 | 0.30669 |
| C78 | C | 0.75436 | 0.45112 | 0.18884 |
| C79 | C | 0.46866 | 0.78757 | 0.24075 |
| N80 | N | 0.48251 | 0.84437 | 0.23763 |
| C81 | C | 0.80272 | 0.92889 | 0.18484 |
| O82 | O | 0.84295 | 0.88904 | 0.16721 |

|      |   |          |          |         |
|------|---|----------|----------|---------|
| C83  | C | 0.89218  | 0.91511  | 0.22353 |
| C84  | C | 1.01614  | 0.83118  | 0.35266 |
| O85  | O | 0.05821  | 0.87046  | 0.33913 |
| C86  | C | 1.03069  | 0.91937  | 0.31379 |
| C87  | C | -0.10907 | 0.15547  | 0.15975 |
| O88  | O | 0.85054  | 0.12223  | 0.0727  |
| C89  | C | 0.85844  | 0.07112  | 0.15591 |
| C90  | C | 0.27107  | 0.21443  | 0.1095  |
| O91  | O | 0.27382  | 0.26394  | 0.21044 |
| C92  | C | 0.25516  | 0.30206  | 0.07337 |
| N93  | N | 0.36812  | -0.0475  | 0.8108  |
| C94  | C | 0.45811  | -0.00999 | 0.72539 |
| C95  | C | -0.45459 | -0.05785 | 0.7112  |
| C96  | C | -0.42539 | -0.00862 | 0.69447 |
| C97  | C | 0.48725  | 0.03917  | 0.70768 |
| C98  | C | 0.39741  | -0.00698 | 0.74435 |
| C99  | C | -0.36437 | -0.01099 | 0.68496 |
| C100 | C | 0.02211  | -0.44818 | 0.79421 |
| C101 | C | -0.03965 | 0.47332  | 0.77869 |
| C102 | C | 0.00545  | 0.43875  | 0.75336 |
| C103 | C | 0.06699  | 0.51731  | 0.76825 |
| C104 | C | 0.03546  | -0.38988 | 0.81245 |
| C105 | C | -0.00685 | 0.38016  | 0.73771 |
| C106 | C | -0.40683 | 0.27617  | 0.7017  |
| O107 | O | 0.55339  | 0.23539  | 0.6693  |
| C108 | C | -0.4169  | 0.18717  | 0.68017 |
| C109 | C | 0.54344  | 0.1388   | 0.68148 |
| O110 | O | -0.42488 | 0.09035  | 0.68169 |
| C111 | C | -0.45461 | 0.04083  | 0.69295 |
| C112 | C | 0.44123  | -0.2957  | 0.73845 |
| O113 | O | 0.48101  | -0.25404 | 0.73966 |
| C114 | C | 0.45032  | -0.20631 | 0.74397 |
| C115 | C | 0.4892   | -0.15734 | 0.73718 |
| O116 | O | 0.45729  | -0.10904 | 0.73865 |
| C117 | C | 0.4872   | -0.05954 | 0.72646 |
| C118 | C | 0.29285  | 0.39275  | 0.67651 |
| O119 | O | 0.2553   | 0.4353   | 0.68961 |
| C120 | C | 0.20311  | 0.40986  | 0.68498 |
| C121 | C | 0.15861  | 0.45176  | 0.72102 |
| O122 | O | 0.10522  | 0.42601  | 0.7198  |
| C123 | C | 0.05984  | 0.46067  | 0.74874 |
| C124 | C | -0.03219 | -0.47044 | 0.79902 |
| O125 | O | -0.0779  | -0.43941 | 0.85256 |
| C126 | C | -0.10052 | -0.40966 | 0.69245 |



|      |   |          |          |         |
|------|---|----------|----------|---------|
| C127 | C | -0.14774 | -0.37562 | 0.76922 |
| O128 | O | -0.15892 | -0.3338  | 0.63608 |
| C129 | C | -0.16983 | -0.28925 | 0.75697 |
| C130 | C | 0.10978  | -0.11134 | 0.85724 |
| C131 | C | 0.1307   | -0.05819 | 0.85132 |
| C132 | C | 0.09285  | -0.01509 | 0.82975 |
| C133 | C | 0.03543  | -0.02673 | 0.80502 |
| C134 | C | 0.01587  | -0.08149 | 0.80683 |
| C135 | C | 0.05346  | -0.1245  | 0.83821 |
| C136 | C | -0.0023  | 0.01653  | 0.77367 |
| C137 | C | -0.05927 | 0.00464  | 0.73746 |
| C138 | C | -0.077   | -0.04971 | 0.73653 |
| C139 | C | -0.04037 | -0.09175 | 0.7713  |
| C140 | C | 0.11082  | 0.03929  | 0.83203 |
| C141 | C | 0.07378  | 0.08149  | 0.80556 |
| C142 | C | 0.01717  | 0.07124  | 0.77547 |
| C143 | C | -0.02024 | 0.11418  | 0.73966 |
| C144 | C | -0.07568 | 0.10083  | 0.70151 |
| C145 | C | -0.09669 | 0.0475   | 0.70042 |
| C146 | C | 0.03792  | -0.18367 | 0.84292 |
| C147 | C | -0.1581  | 0.04048  | 0.67097 |
| C148 | C | -0.005   | 0.17339  | 0.74264 |
| C149 | C | 0.19232  | -0.05141 | 0.85595 |
| C150 | C | -0.01719 | -0.20237 | 0.86298 |
| C151 | C | -0.02988 | -0.2581  | 0.86353 |
| C152 | C | 0.01236  | -0.29616 | 0.84519 |
| C153 | C | 0.0675   | -0.27797 | 0.82785 |
| C154 | C | 0.07996  | -0.22252 | 0.82732 |
| C155 | C | -0.19002 | 0.08594  | 0.61992 |
| C156 | C | -0.24768 | 0.08213  | 0.60745 |
| C157 | C | -0.27501 | 0.03281  | 0.64595 |
| C158 | C | -0.24392 | -0.01307 | 0.69505 |
| C159 | C | -0.1861  | -0.00903 | 0.7077  |
| C160 | C | 0.22492  | -0.09287 | 0.93682 |
| C161 | C | 0.28264  | -0.09063 | 0.92368 |
| C162 | C | 0.27715  | -0.00477 | 0.75091 |
| C163 | C | 0.21927  | -0.00726 | 0.76318 |
| C164 | C | 0.04154  | 0.19347  | 0.84608 |
| C165 | C | 0.05305  | 0.24937  | 0.85534 |
| C166 | C | -0.02875 | 0.26682  | 0.65984 |
| C167 | C | -0.03983 | 0.21104  | 0.64957 |
| N168 | N | -0.00163 | -0.35292 | 0.83726 |
| N169 | N | -0.33423 | 0.03182  | 0.64714 |
| C170 | C | 0.30906  | -0.04692 | 0.82955 |

|      |   |          |          |         |
|------|---|----------|----------|---------|
| C171 | C | 0.01778  | 0.28639  | 0.76368 |
| N172 | N | 0.02948  | 0.34351  | 0.77978 |
| C173 | C | 0.35094  | 0.41381  | 0.71907 |
| O174 | O | 0.38791  | 0.37063  | 0.71413 |
| C175 | C | 0.4402   | 0.39525  | 0.69885 |
| C176 | C | 0.56883  | 0.33102  | 0.65222 |
| O177 | O | -0.39063 | 0.37145  | 0.67445 |
| C178 | C | 0.58012  | 0.41998  | 0.67435 |
| C179 | C | -0.5304  | -0.35038 | 0.73579 |
| O180 | O | 0.42957  | -0.39191 | 0.73356 |
| C181 | C | 0.45962  | -0.43961 | 0.71134 |
| C182 | C | -0.16078 | -0.237   | 0.64215 |
| O183 | O | -0.16861 | -0.19282 | 0.7683  |
| C184 | C | -0.18227 | -0.15    | 0.64282 |

---

Table S3. Atomistic coordinates of AA stacking model for PyTTA-DHTA-COF optimized by using CASTEP-method.

Space group: *P1*;

$a = 24.5960 \text{ \AA}$ ,  $b = 24.0958 \text{ \AA}$ ,  $c = 3.5171 \text{ \AA}$ ;

$\alpha = \beta = \gamma = 90.0000^\circ$ .

|  | Atom | x/a | y/b     | z/c      |          |
|--|------|-----|---------|----------|----------|
|  | C1   | C   | 1.49638 | -2.94188 | -0.49504 |
|  | C2   | C   | 1.45335 | -3.03509 | -0.45342 |
|  | C3   | C   | 1.49584 | -2.88084 | -0.49455 |
|  | N4   | N   | 1.54832 | -3.14488 | -0.55756 |
|  | C5   | C   | 1.9444  | -2.48902 | -0.49274 |
|  | C6   | C   | 1.96031 | -2.54381 | -0.54303 |
|  | C7   | C   | 2.01556 | -2.55417 | -0.54969 |
|  | C8   | C   | 1.88721 | -2.4743  | -0.48232 |
|  | O9   | O   | 1.3991  | -2.95703 | -0.39708 |
|  | C10  | C   | 1.44925 | -2.97753 | -0.44805 |
|  | O11  | O   | 2.07732 | -2.41248 | -0.41418 |
|  | C12  | C   | 1.38868 | -2.59768 | -0.47403 |
|  | C13  | C   | 1.44107 | -2.6171  | -0.46213 |
|  | C14  | C   | 1.48608 | -2.5774  | -0.46632 |
|  | C15  | C   | 1.47734 | -2.51988 | -0.49454 |
|  | C16  | C   | 1.42353 | -2.50193 | -0.51209 |
|  | C17  | C   | 1.37837 | -2.54135 | -0.49545 |
|  | C18  | C   | 1.46046 | -2.40644 | -0.55971 |
|  | C19  | C   | 1.41637 | -2.44512 | -0.54932 |
|  | C20  | C   | 1.31992 | -2.52701 | -0.49711 |
|  | C21  | C   | 1.55454 | -2.32112 | -0.55042 |
|  | C22  | C   | 1.30435 | -2.47277 | -0.42903 |
|  | C23  | C   | 1.24954 | -2.46067 | -0.42401 |
|  | C24  | C   | 1.22373 | -2.5572  | -0.55022 |
|  | C25  | C   | 1.27859 | -2.56907 | -0.55614 |
|  | C26  | C   | 1.60142 | -2.28602 | -0.61591 |
|  | C27  | C   | 1.59894 | -2.22826 | -0.61892 |
|  | C28  | C   | 1.54951 | -2.20419 | -0.55616 |
|  | C29  | C   | 1.50244 | -2.23861 | -0.48968 |
|  | C30  | C   | 1.50515 | -2.29631 | -0.48596 |
|  | C31  | C   | 1.79109 | -2.49728 | -0.5157  |
|  | N32  | N   | 1.8469  | -2.51092 | -0.52491 |
|  | H33  | H   | 0.02381 | 0.42397  | 0.17056  |
|  | H34  | H   | 0.02479 | 0.41599  | 0.69012  |
|  | H35  | H   | 0.11148 | 0.5745   | 0.76478  |
|  | H36  | H   | 0.53624 | 0.1439   | 0.45765  |
|  | H37  | H   | 0.87901 | 0.57124  | 0.56533  |
|  | H38  | H   | 0.40383 | 0.08415  | 0.74444  |

|     |   |         |         |         |
|-----|---|---------|---------|---------|
| H39 | H | 0.35158 | 0.37162 | 0.53369 |
| H40 | H | 0.4523  | 0.63942 | 0.40974 |
| H41 | H | 0.37315 | 0.56921 | 0.42864 |
| H42 | H | 0.33669 | 0.5623  | 0.62338 |
| H43 | H | 0.23781 | 0.58372 | 0.62951 |
| H44 | H | 0.19094 | 0.40805 | 0.40084 |
| H45 | H | 0.29048 | 0.3866  | 0.39057 |
| H46 | H | 0.6423  | 0.69538 | 0.33232 |
| H47 | H | 0.6374  | 0.79943 | 0.32721 |
| H48 | H | 0.4618  | 0.78051 | 0.56154 |
| H49 | H | 0.46685 | 0.67587 | 0.57009 |
| H50 | H | 0.42481 | 0.94731 | 0.31509 |
| H51 | H | 0.43832 | 0.94651 | 0.82891 |

---

Table S4. Atomistic coordinates of AB stacking model for PyTTA-DHTA-COF optimized by using CASTEP-method.

Space group: *P1*;

$a = 24.5987 \text{ \AA}$ ,  $b = 23.9210 \text{ \AA}$ ,  $c = 6.8241 \text{ \AA}$ ;

$\alpha = \beta = \gamma = 90.0000^\circ$ .

|     | Atom | x/a     | y/b     | z/c     |
|-----|------|---------|---------|---------|
| C1  | C    | 0.48708 | 0.04362 | 0.24299 |
| C2  | C    | 0.45983 | 0.94807 | 0.38855 |
| C3  | C    | 0.4835  | 0.10146 | 0.22581 |
| N4  | N    | 0.53811 | 0.83761 | 0.17254 |
| C5  | C    | 0.93612 | 0.49305 | 0.24865 |
| C6  | C    | 0.95264 | 0.43791 | 0.25947 |
| C7  | C    | 0.01138 | 0.42484 | 0.26202 |
| C8  | C    | 0.8817  | 0.50643 | 0.24649 |
| O9  | O    | 0.418   | 0.03311 | 0.49375 |
| C10 | C    | 0.45512 | 0.01007 | 0.37331 |
| O11 | O    | 0.07286 | 0.57381 | 0.23194 |
| C12 | C    | 0.38149 | 0.38664 | 0.26989 |
| C13 | C    | 0.43375 | 0.36701 | 0.27226 |
| C14 | C    | 0.47906 | 0.40598 | 0.26384 |
| C15 | C    | 0.47106 | 0.46397 | 0.25294 |
| C16 | C    | 0.41742 | 0.48291 | 0.24871 |
| C17 | C    | 0.37171 | 0.44361 | 0.25729 |
| C18 | C    | 0.45581 | 0.57883 | 0.22901 |
| C19 | C    | 0.41114 | 0.54051 | 0.23597 |
| C20 | C    | 0.31328 | 0.45853 | 0.2538  |
| C21 | C    | 0.54921 | 0.66149 | 0.21434 |
| C22 | C    | 0.29813 | 0.51422 | 0.24972 |
| C23 | C    | 0.24342 | 0.52681 | 0.24727 |
| C24 | C    | 0.21676 | 0.42804 | 0.25315 |
| C25 | C    | 0.2715  | 0.41568 | 0.25538 |
| C26 | C    | 0.5837  | 0.69386 | 0.08926 |
| C27 | C    | 0.5797  | 0.75177 | 0.07672 |
| C28 | C    | 0.54147 | 0.77826 | 0.18984 |
| C29 | C    | 0.50729 | 0.74615 | 0.31705 |
| C30 | C    | 0.51127 | 0.68826 | 0.32932 |
| C31 | C    | 0.78556 | 0.48326 | 0.25103 |
| N32 | N    | 0.84126 | 0.46914 | 0.25304 |
| C33 | C    | 0.50088 | 0.92352 | 0.25668 |
| C34 | C    | 0.52814 | 0.01907 | 0.11111 |
| C35 | C    | 0.50447 | 0.86568 | 0.27391 |
| N36 | N    | 0.44994 | 0.12955 | 0.3275  |
| C37 | C    | 0.05187 | 0.4741  | 0.25211 |
| C38 | C    | 0.03535 | 0.52924 | 0.24135 |

|     |   |          |         |         |
|-----|---|----------|---------|---------|
| C39 | C | 0.97661  | 0.5423  | 0.23876 |
| C40 | C | 0.10629  | 0.46071 | 0.25415 |
| O41 | O | 0.56998  | 0.93403 | 0.00594 |
| C42 | C | 0.53286  | 0.95707 | 0.12639 |
| O43 | O | 0.91513  | 0.39334 | 0.26896 |
| C44 | C | 0.60649  | 0.5805  | 0.22989 |
| C45 | C | 0.55423  | 0.60013 | 0.22745 |
| C46 | C | 0.50892  | 0.56115 | 0.23582 |
| C47 | C | 0.51692  | 0.50316 | 0.24671 |
| C48 | C | 0.57056  | 0.48423 | 0.25096 |
| C49 | C | 0.61627  | 0.52352 | 0.24246 |
| C50 | C | 0.53217  | 0.3883  | 0.27064 |
| C51 | C | 0.57684  | 0.42662 | 0.26372 |
| C52 | C | 0.67469  | 0.5086  | 0.24606 |
| C53 | C | 0.43878  | 0.30565 | 0.28542 |
| C54 | C | 0.68985  | 0.45291 | 0.25019 |
| C55 | C | 0.74456  | 0.44033 | 0.25281 |
| C56 | C | 0.77122  | 0.53911 | 0.24695 |
| C57 | C | 0.71648  | 0.55146 | 0.24455 |
| C58 | C | 0.40441  | 0.27332 | 0.41097 |
| C59 | C | 0.40843  | 0.21541 | 0.4236  |
| C60 | C | 0.44657  | 0.18889 | 0.31013 |
| C61 | C | 0.48063  | 0.22098 | 0.18248 |
| C62 | C | 0.47662  | 0.27886 | 0.17012 |
| C63 | C | 0.20242  | 0.48388 | 0.24918 |
| N64 | N | 0.14672  | 0.49801 | 0.24738 |
| C65 | C | -0.01001 | 0.04514 | 0.74334 |
| C66 | C | -0.03729 | 0.94959 | 0.88884 |
| C67 | C | -0.0136  | 0.10298 | 0.72611 |
| N68 | N | 0.04093  | 0.83911 | 0.6726  |
| C69 | C | 0.43899  | 0.49457 | 0.74786 |
| C70 | C | 0.45551  | 0.43943 | 0.75862 |
| C71 | C | -0.48575 | 0.42636 | 0.76123 |
| C72 | C | 0.38457  | 0.50795 | 0.74583 |
| O73 | O | -0.07917 | 0.03463 | 0.99385 |
| C74 | C | -0.04202 | 0.01159 | 0.87354 |
| O75 | O | -0.42427 | 0.57532 | 0.73099 |
| C76 | C | -0.11563 | 0.38817 | 0.77006 |
| C77 | C | -0.06337 | 0.36853 | 0.77249 |
| C78 | C | -0.01806 | 0.40751 | 0.76414 |
| C79 | C | -0.02606 | 0.4655  | 0.75328 |
| C80 | C | -0.0797  | 0.48444 | 0.74902 |
| C81 | C | -0.12541 | 0.44514 | 0.75751 |
| C82 | C | -0.04131 | 0.58036 | 0.72938 |

|      |   |          |         |         |
|------|---|----------|---------|---------|
| C83  | C | -0.08598 | 0.54204 | 0.73629 |
| C84  | C | -0.18383 | 0.46006 | 0.75393 |
| C85  | C | 0.05207  | 0.66301 | 0.71462 |
| C86  | C | -0.19899 | 0.51575 | 0.74979 |
| C87  | C | -0.2537  | 0.52834 | 0.74717 |
| C88  | C | -0.28036 | 0.42956 | 0.75305 |
| C89  | C | -0.22562 | 0.4172  | 0.75545 |
| C90  | C | 0.08646  | 0.69535 | 0.58912 |
| C91  | C | 0.08244  | 0.75326 | 0.5765  |
| C92  | C | 0.04429  | 0.77977 | 0.68995 |
| C93  | C | 0.01022  | 0.74769 | 0.81756 |
| C94  | C | 0.01423  | 0.6898  | 0.8299  |
| C95  | C | 0.28844  | 0.48479 | 0.75081 |
| N96  | N | 0.34414  | 0.47066 | 0.75261 |
| C97  | C | 0.00378  | 0.92505 | 0.75706 |
| C98  | C | 0.03106  | 0.0206  | 0.61157 |
| C99  | C | 0.00736  | 0.86721 | 0.77424 |
| N100 | N | -0.04725 | 0.13106 | 0.82744 |
| C101 | C | -0.44526 | 0.47562 | 0.75134 |
| C102 | C | -0.46178 | 0.53076 | 0.74051 |
| C103 | C | 0.47948  | 0.54382 | 0.73795 |
| C104 | C | -0.39084 | 0.46223 | 0.75351 |
| O105 | O | 0.07292  | 0.93556 | 0.50653 |
| C106 | C | 0.03577  | 0.9586  | 0.62684 |
| O107 | O | 0.41799  | 0.39486 | 0.76801 |
| C108 | C | 0.10937  | 0.58203 | 0.73014 |
| C109 | C | 0.05711  | 0.60166 | 0.72777 |
| C110 | C | 0.01179  | 0.56268 | 0.73618 |
| C111 | C | 0.0198   | 0.50469 | 0.74706 |
| C112 | C | 0.07344  | 0.48576 | 0.75128 |
| C113 | C | 0.11915  | 0.52505 | 0.74272 |
| C114 | C | 0.03505  | 0.38983 | 0.77094 |
| C115 | C | 0.07972  | 0.42815 | 0.76401 |
| C116 | C | 0.17757  | 0.51013 | 0.7462  |
| C117 | C | -0.05834 | 0.30717 | 0.7856  |
| C118 | C | 0.19273  | 0.45444 | 0.75028 |
| C119 | C | 0.24744  | 0.44185 | 0.75273 |
| C120 | C | 0.2741   | 0.54063 | 0.74684 |
| C121 | C | 0.21936  | 0.55299 | 0.74461 |
| C122 | C | -0.09284 | 0.2748  | 0.91068 |
| C123 | C | -0.08884 | 0.21689 | 0.92322 |
| C124 | C | -0.0506  | 0.1904  | 0.81012 |
| C125 | C | -0.01643 | 0.22252 | 0.68291 |
| C126 | C | -0.02041 | 0.28041 | 0.67063 |

|      |   |          |         |          |
|------|---|----------|---------|----------|
| C127 | C | -0.2947  | 0.4854  | 0.74897  |
| N128 | N | -0.3504  | 0.49952 | 0.74694  |
| H129 | H | 0.41821  | 0.92647 | 0.35628  |
| H130 | H | 0.47194  | 0.93691 | 0.54433  |
| H131 | H | 0.51199  | 0.12398 | 0.11577  |
| H132 | H | 0.01905  | 0.39602 | 0.13317  |
| H133 | H | 0.02059  | 0.40178 | 0.40325  |
| H134 | H | 0.87363  | 0.55281 | 0.2385   |
| H135 | H | 0.43961  | 0.06203 | 0.59896  |
| H136 | H | 0.05795  | 0.60933 | 0.31713  |
| H137 | H | 0.34437  | 0.35581 | 0.27843  |
| H138 | H | 0.44864  | 0.62535 | 0.21757  |
| H139 | H | 0.36815  | 0.55578 | 0.2313   |
| H140 | H | 0.33076  | 0.55015 | 0.24836  |
| H141 | H | 0.23211  | 0.57232 | 0.24369  |
| H142 | H | 0.18367  | 0.39256 | 0.25456  |
| H143 | H | 0.28299  | 0.37023 | 0.25854  |
| H144 | H | 0.6153   | 0.67293 | -0.00318 |
| H145 | H | 0.60771  | 0.77766 | -0.02615 |
| H146 | H | 0.47615  | 0.76732 | 0.41081  |
| H147 | H | 0.48358  | 0.6624  | 0.43333  |
| H148 | H | 0.51756  | 0.02948 | -0.04686 |
| H149 | H | 0.56899  | 0.04159 | 0.14842  |
| H150 | H | 0.4759   | 0.84314 | 0.38366  |
| H151 | H | 0.96866  | 0.56673 | 0.09927  |
| H152 | H | 0.96768  | 0.56982 | 0.36987  |
| H153 | H | 0.11436  | 0.41434 | 0.26223  |
| H154 | H | 0.61165  | 0.95049 | 0.04603  |
| H155 | H | 0.87995  | 0.40477 | 0.35928  |
| H156 | H | 0.64361  | 0.61133 | 0.22143  |
| H157 | H | 0.53934  | 0.34178 | 0.28205  |
| H158 | H | 0.61983  | 0.41135 | 0.26841  |
| H159 | H | 0.65722  | 0.41699 | 0.25147  |
| H160 | H | 0.75588  | 0.39482 | 0.25642  |
| H161 | H | 0.8043   | 0.57459 | 0.24559  |
| H162 | H | 0.70498  | 0.59691 | 0.24132  |
| H163 | H | 0.37288  | 0.29426 | 0.50371  |
| H164 | H | 0.38051  | 0.18954 | 0.52684  |
| H165 | H | 0.51169  | 0.19978 | 0.08844  |
| H166 | H | 0.50423  | 0.3047  | 0.06577  |
| H167 | H | 0.3765   | 0.55433 | 0.73772  |
| H168 | H | 0.11799  | 0.67441 | 0.49641  |
| H169 | H | 0.11036  | 0.77913 | 0.4733   |
| H170 | H | -0.02085 | 0.76888 | 0.91158  |



|      |   |          |         |         |
|------|---|----------|---------|---------|
| H171 | H | -0.01339 | 0.66396 | 0.93422 |
| H172 | H | 0.02052  | 0.03101 | 0.45357 |
| H173 | H | 0.07191  | 0.04311 | 0.64899 |
| H174 | H | -0.02115 | 0.84469 | 0.88422 |
| H175 | H | 0.47153  | 0.56825 | 0.59846 |
| H176 | H | 0.47056  | 0.57135 | 0.86907 |
| H177 | H | 0.11459  | 0.95203 | 0.54672 |
| H178 | H | 0.3828   | 0.40628 | 0.85828 |
| H179 | H | 0.14649  | 0.61286 | 0.72163 |
| H180 | H | 0.04222  | 0.34331 | 0.78237 |
| H181 | H | 0.12271  | 0.41288 | 0.76868 |
| H182 | H | 0.1601   | 0.41852 | 0.75166 |
| H183 | H | 0.25875  | 0.39635 | 0.75631 |
| H184 | H | 0.30719  | 0.57611 | 0.74542 |
| H185 | H | 0.20787  | 0.59844 | 0.74144 |
| H186 | H | 0.9211   | 0.92798 | 0.85652 |
| H187 | H | 0.9748   | 0.93845 | 1.04465 |
| H188 | H | 1.01498  | 0.12552 | 0.61639 |
| H189 | H | 0.52193  | 0.39754 | 0.63241 |
| H190 | H | 0.52344  | 0.4033  | 0.90248 |
| H191 | H | 0.94241  | 0.06356 | 1.09908 |
| H192 | H | 0.56084  | 0.61085 | 0.81617 |
| H193 | H | 0.84725  | 0.35734 | 0.7785  |
| H194 | H | 0.95152  | 0.62689 | 0.71797 |
| H195 | H | 0.87103  | 0.55731 | 0.7316  |
| H196 | H | 0.83364  | 0.55168 | 0.74851 |
| H197 | H | 0.73498  | 0.57384 | 0.74355 |
| H198 | H | 0.68656  | 0.39408 | 0.75442 |
| H199 | H | 0.78588  | 0.37175 | 0.7587  |
| H200 | H | 0.61723  | 0.41585 | 0.76151 |
| H201 | H | 0.87556  | 0.29573 | 1.0031  |
| H202 | H | 0.88315  | 0.191   | 1.02609 |
| H203 | H | 1.01472  | 0.20134 | 0.58916 |
| H204 | H | 1.00728  | 0.30626 | 0.56663 |

---

Table S5. Elemental analysis of PyTTA-BMTP-COF and PyTTA-DHTA-COF.

| Materials      |             | C (wt.%) | H (wt.%) | N (wt.%) |
|----------------|-------------|----------|----------|----------|
| PyTTA-BMTP-COF | theoretical | 76.90    | 5.90     | 3.88     |
|                | analysis    | 72.22    | 6.29     | 4.08     |
| PyTTA-DHTA-COF | theoretical | 84.06    | 4.35     | 5.41     |
|                | analysis    | 79.56    | 4.93     | 5.97     |

Table S6. Summary of the anhydrous proton conductors based on COFs.

| Materials                                     | $\sigma$ (mS cm <sup>-1</sup> ) | T (K)      | E <sub>a</sub> (eV) | Ref.             |
|-----------------------------------------------|---------------------------------|------------|---------------------|------------------|
| <b>PA@PyTTA-BMTP-COF</b>                      | <b>26.00</b>                    | <b>413</b> | <b>0.22</b>         | <b>This work</b> |
| <b>PA@PyTTA-DHTA-COF</b>                      | <b>9.20</b>                     | <b>413</b> | <b>0.078</b>        | <b>This work</b> |
| H <sub>3</sub> PO <sub>4</sub> @TpBpy-MC      | 2.50                            | 393        | 0.11                | 1                |
| H <sub>3</sub> PO <sub>4</sub> @Tp-Azo-COF    | 6.7×10 <sup>-2</sup>            | 340        | 0.11                | 2                |
| H <sub>3</sub> PO <sub>4</sub> @COF-F6-H      | 42.00                           | 413        | 0.16                | 3                |
| phytic@TpPa-(SO <sub>3</sub> H-Py)            | 5.0×10 <sup>-2</sup>            | 393        | 0.16                | 4                |
| phytic@TpPa-SO <sub>3</sub> H                 | 7.5×10 <sup>-2</sup>            | 393        | 0.10                | 4                |
| im@XJCOF-1                                    | 43.80                           | 413        | 0.21                | 5                |
| PIL-TB-COF                                    | 2.21                            | 393        | 0.30                | 6                |
| PA@EB-COF                                     | 9.66                            | 433        | 0.35                | 7                |
| Tra@EB-COF                                    | 3.25                            | 433        | 0.18                | 7                |
| F6-[dema]HSO <sub>4</sub> -1.5                | 13.3                            | 413        | 0.34                | 8                |
| H <sub>3</sub> PO <sub>4</sub> @TPB-DABI-COF  | 97.10                           | 393        | 0.23                | 9                |
| Im@Py-TT-COF-50                               | 3.08                            | 403        | 0.31                | 10               |
| im@TPB-DMTP-COF                               | 4.37                            | 403        | 0.38                | 11               |
| Tri@TPB-DMTP-COF                              | 1.10                            | 403        | 0.21                | 11               |
| H@TPT-COF                                     | 12.7                            | 433        | 0.17                | 12               |
| H <sub>3</sub> PO <sub>4</sub> @TPB-DMeTP-COF | 191                             | 433        | 0.34                | 13               |
| H <sub>3</sub> PO <sub>4</sub> @CMP-F6-60%    | 4.39                            | 393        | 0.35                | 14               |

## References

1. D. B. Shinde, H. B. Aiyappa, M. Bhadra, B. P. Biswal, P. Wadge, S. Kandambeth, B. Garai, T. Kundu, S. Kurungot, R. Banerjee, *J. Mater. Chem. A*, 2016, **4**, 2682-2690.
2. S. Chandra, T. Kundu, S. Kandambeth, R. Babarao, Y. Marathe, S. M. Kunjir, R. Banerjee, *J. Am. Chem. Soc.*, 2014, **136**, 6570-6573.
3. X. Wu, Y. L. Hong, B. Xu, Y. Nishiyama, W. Jiang, J. Zhu, G. Zhang, S. Kitagawa, S. Horike, *J. Am. Chem. Soc.*, 2020, **142**, 14357-14364.
4. S. Chandra, T. Kundu, K. Dey, M. Addicoat, T. Heine, R. Banerjee, *Chem. Mater.*, 2016, **28**, 1489-1494.
5. Y. Fu, Y. Wu, S. Chen, W. Zhang, Y. Zhang, T. Yan, B. Yang, H. Ma, *ACS Nano.*, 2021, **15**, 19743-19755.
6. Y. Guo, X. Zou, W. Li, Y. Hu, Z. Jin, Z. Sun, S. Gong, S. Guo, F. Yan, *J. Mater. Chem. A*, 2022, **10**, 6499-6507.
7. S. Chen, Y. Wu, Y. Zhang, W. Zhang, Y. Fu, W. Huang, T. Yan, H. Ma, *J. Mater. Chem. A*, 2020, **8**, 13702-13709.
8. X. Wu, Z. Liu, H. Guo, Y. L. Hong, B. Xu, K. Zhang, Y. Nishiyama, W. Jiang, S. Horike, S. Kitagawa, G. Zhang, *ACS Appl. Mater. Interfaces*, 2021, **13**, 37172-37178.
9. J. Li, J. Wang, Z. Wu, S. Tao, D. Jiang, *Angew. Chem. Int. Ed.*, 2021, **60**, 12918-12923.
10. S. Li, Y. Liu, L. Li, C. Liu, J. Li, S. Ashraf, P. Li, B. Wang, *ACS Appl. Mater. Interfaces*, 2020, **12**, 22910-22916.
11. H. Xu, S. Tao, D. Jiang, *Nat. Mater.*, 2016, **15**, 722-726.
12. G. Jiang, W. Zou, Z. Ou, L. Zhang, W. Zhang, X. Wang, H. Song, Z. Cui, Z. Liang, L. Du, *Angew. Chem. Int. Ed.*, 2022, **61**, e202208086.
13. S. Tao, L. Zhai, A. D. Dinga Wonanke, M. A. Addicoat, Q. Jiang, D. Jiang, *Nat. Commun.*, 2020, **11**, 1981.
14. X. Jiang, K. Zhang, Y. Huang, B. Xu, X. Xu, J. Zhang, Z. Liu, Y. Wang, Y. Pan, S. Bian, Q. Chen, X. Wu, G. Zhang, *ACS Appl. Mater. Interfaces*, 2021, **13**, 15536-15541.
